# Supplementary material
Source: PubMed Central journal article supplement (PMC6346130)
Supplement: b6568fb1e81470df9f27121361e0a0b1_IAI.00634-18-s0001.pdf [file b6568fb1e81470df9f27121361e0a0b1_IAI.00634-18-s0001.pdf]

## Supplemental Material

Table S1. Diarrhea and fecal shedding of bacteria after challenge of *A. nancymae* with H10407, H10407-P or HS <sup>a,b</sup>

| Treatment (CFU)                               | No. of animals | Diarrhea                |                                |                                   | Fecal shedding of H10407 |                                   |                                      |
|-----------------------------------------------|----------------|-------------------------|--------------------------------|-----------------------------------|--------------------------|-----------------------------------|--------------------------------------|
|                                               |                | No. with diarrhea/N (%) | Median no. days to onset (IQR) | Median no. days of duration (IQR) | % Incidence              | Median no. of days to onset (IQR) | Median no. of days of duration (IQR) |
| H10407 (8.0x10 <sup>9</sup> )                 | 5 <sup>c</sup> | 2/5 (40)                | 6.5 (4-9)                      | 4.5 (2-7)                         | 100                      | 1 (-)                             | 10 (4-10)                            |
| H10407 (5.1x10 <sup>10</sup> )                | 5              | 3/5 (60)                | 1 (1-5)                        | 3 (2-3)                           | 100                      | 1 (1-1.5)                         | 4 (1-10)                             |
| H10407 (5.8x10 <sup>11</sup> )                | 5              | 4/5 (80)                | 1 (-)                          | 8.5 (5.5-10)                      | 100                      | 1 (-)                             | 9 (5.5-10)                           |
| H10407 (7.5x10 <sup>11</sup> )                | 10             | 8/10 (80)               | 1 (1-5.75)                     | 7.5 (2.25-10)                     | 100                      | 1 (-)                             | 7 (5-8)                              |
| H10407-P (6.4x10 <sup>11</sup> ) <sup>d</sup> | 5              | 1/5 (20)                | 1(-)                           | 10 (-)                            | -                        | -                                 | -                                    |
| HS (7.9x10 <sup>11</sup> ) <sup>d</sup>       | 5              | 2/5 (40)                | 3.5 (2-5)                      | 6 (-)                             | -                        | -                                 | -                                    |

<sup>a</sup> A diarrheal episode was defined as 2 or more consecutive days of grade 3 or higher stool consistency that begins as the first day of at least 2 consecutive days of diarrhea starting as early as day one after challenge, and ends when 2 or more days pass without diarrhea.

<sup>b</sup> Fecal shedding defined as isolation of H10407 from stool collected after challenge that begins (onset) as early as day one after challenge and ends (duration) on last day, up to day 10, that H10407 are shed in the stool.

<sup>c</sup> Two animals were excluded from the fecal shedding analysis only, due to missing data on study days 1 and 2; (n = 3).

<sup>d</sup> Fecal shedding was not assessed in control groups due to limitations in the ability to differentiate from other commensal *E. coli* colonies.

Table S2. Diarrhea and fecal shedding of bacteria after IN vaccination with dscCfaE and challenge with H10407 (~5x10<sup>11</sup>) <sup>a,b</sup>

| Expt | Vaccine (no. of doses) <sup>c</sup> | No. of animals | Diarrhea                |                                |                                | Fecal shedding of H10407 |                                |                                   |
|------|-------------------------------------|----------------|-------------------------|--------------------------------|--------------------------------|--------------------------|--------------------------------|-----------------------------------|
|      |                                     |                | No. with diarrhea/N (%) | Median no. days to onset (IQR) | Median no. days duration (IQR) | % Incidence              | Median no. days to onset (IQR) | Median no. days of duration (IQR) |
| 1    | dscCfaE (4)                         | 10             | 3/10 (30)               | 1 (1-3)                        | 2 (2-3)                        | 100                      | 1 (-)                          | 4.5 (3-7.25)                      |
|      | dscCfaE+CTB (4)                     | 10             | 2/10 (20)               | 1 (-)                          | 4 (-)                          | 100                      | 1 (-)                          | 4.5 (2.5-7)                       |
|      | PBS (4)                             | 10             | 9/10 (90)               | 1 (-)                          | 4 (2.5-6)                      | 100                      | 1 (-)                          | 4.5 (3.75-7)                      |
| 2    | dscCfaE+LTB (4)                     | 8              | 1/8 (12.5)              | 6 (-)                          | 2 (-)                          | 100                      | 1 (-)                          | 3.5 (3-5.5)                       |
|      | dscCfaE+LTB (3)                     | 8              | 3/8 (37.5)              | 1 (1-5)                        | 7 (3-10)                       | 100                      | 1 (-)                          | 5 (3-6)                           |
|      | PBS (4)                             | 8              | 6/8 (75)                | 1 (-)                          | 4.5 (3.75-6.25)                | 100                      | 1 (-)                          | 5 (4-5.75)                        |
| 3    | dscCfaE+LTB (4)                     | 10             | 4/10 (40)               | 1 (1-1.75)                     | 2.5 (2-8.25)                   | 100                      | 1 (-)                          | 4 (3.75-5.25)                     |
|      | PBS (4)                             | 10             | 7/10 (70)               | 2 (1-5)                        | 3 (2-5)                        | 100                      | 1 (-)                          | 6 (5-8.25)                        |

<sup>a</sup> A diarrheal episode was defined as 2 or more consecutive days of grade 3 or higher stool consistency that begins as the first day of at least 2 consecutive days of diarrhea starting as early as day one after challenge, and ends when 2 or more days pass without diarrhea.

<sup>b</sup> Fecal shedding defined as isolation of H10407 from stool collected after challenge that begins (onset) as early as day one after challenge and ends (duration) on last day, up to day 10, that H10407 are shed in the stool.

<sup>c</sup> All vaccine antigens were administered intranasally; for all vaccinations, doses of 0.2 mg dscCfaE and 0.29 mg adjuvant were given; vaccinations were performed on study days 0, 14, 28, 84 (4) or study days 56, 70, 84 (3).

23 Table S3. Serum antibody titers in *A. nancymaae* vaccinated with dscCfaE and challenged with H10407 (~5x10<sup>11</sup>)

24

| Expt | Vaccine (no. of doses) <sup>a</sup> | No. of animals | Anti-dscCfaE         |             |                      |             | Anti-toxoid          |             |
|------|-------------------------------------|----------------|----------------------|-------------|----------------------|-------------|----------------------|-------------|
|      |                                     |                | Mean IgG titers (SD) |             | Mean IgA titers (SD) |             | Mean IgG titers (SD) |             |
|      |                                     |                | Day 42               | Day 98      | Day 42               | Day 98      | Day 42               | Day 98      |
| 1    | dscCfaE (4)                         | 10             | 2.19 (1.0)           | 3.14 (0.64) | 0.93 (0.65)          | 1.70 (0.51) | 0.43 (0.07)          | 0.42 (0.03) |
|      | dscCfaE+CTB (4)                     | 10             | 3.77 (0.30)          | 3.89 (0.35) | 1.98 (0.29)          | 2.11 (0.26) | 3.80 (0.32)          | 3.74 (0.20) |
|      | PBS (4)                             | 10             | 0.57 (0.54)          | 0.57 (0.52) | 0.42 (0.08)          | 0.45 (0.09) | 0.4(0)               | 0.4 (0)     |
| 2    | dscCfaE+LTB (4)                     | 8              | 3.12 (0.41)          | 3.70 (0.47) | 1.24 (0.53)          | 1.84 (0.45) | 2.19 (0.70)          | 2.85 (0.57) |
|      | dscCfaE+LTB (3) <sup>b</sup>        | 8              | -                    | 2.77 (0.58) | -                    | 1.07 (0.59) | -                    | 2.63 (0.78) |
|      | PBS (4)                             | 8              | 0.77 (0.58)          | 0.75 (0.51) | 0.44 (0.12)          | 0.47 (0.18) | 0.4 (0)              | 0.4 (0)     |
| 3    | dscCfaE LTB (4)                     | 10             | 1.54 (1.10)          | 2.52 (0.79) | 0.75 (0.51)          | 1.35 (0.77) | 2.20 (0.56)          | 2.35 (0.46) |
|      | PBS (4)                             | 10             | 0.4 (0)              | 0.4 (0)     | 0.4 (0)              | 0.4 (0)     | 0.54 (0.23)          | 0.48 (0.16) |

25 <sup>a</sup> All vaccine antigens were administered intranasally; for all vaccinations, doses of 0.2 mg dscCfaE and 0.29 mg adjuvant were given; vaccinations were performed on  
 26 study days 0, 14, 28, 84 (4) or study days 56, 70, 84 (3)

27 <sup>b</sup> Data was not collected on day 42 for the three dose group
